# Supplementary material for: Longitudinal Dynamics of SARS-CoV-2 IgG Antibody Responses after the Two-Dose Regimen of BNT162b2 Vaccination and the Effect of a Third Dose on Healthcare Workers in Japan
Source: MDPI journal article supplement (doi:10.3390/vaccines10060830), 2022-05-24
Supplement: s1 [file s1]

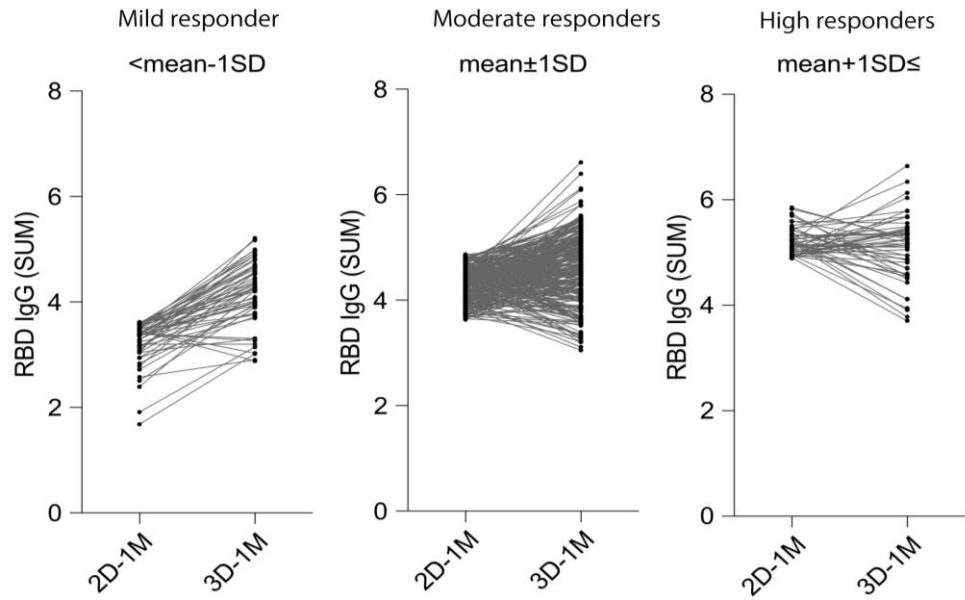

**Figure S1.** Anti-RBD IgG titers at 1M after the second dose and third dose of BNT162b2 vaccination of Mild responder (< mean -1SD), Moderate responders (mean ± 1SD) and High responders (mean + 1SD ≤). Cohort participant were divided into three groups based on anti-RBD IgG antibody titers at 2D-1M as shown in Figure 5A.

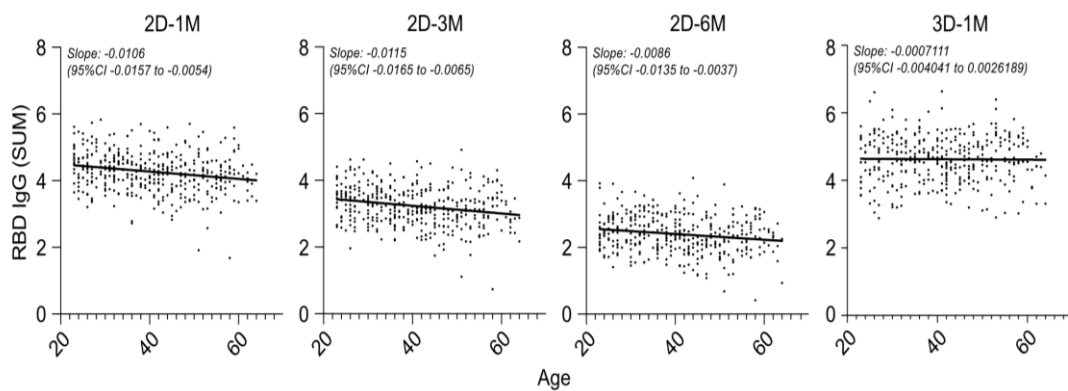

**Figure S2.** Regression analysis of anti-RBD IgG titers with age of individuals obtained at 2D-1M, 2D-3M, 2D-6M and 3D-1M. Linear regression lines are shown in black solid lines.

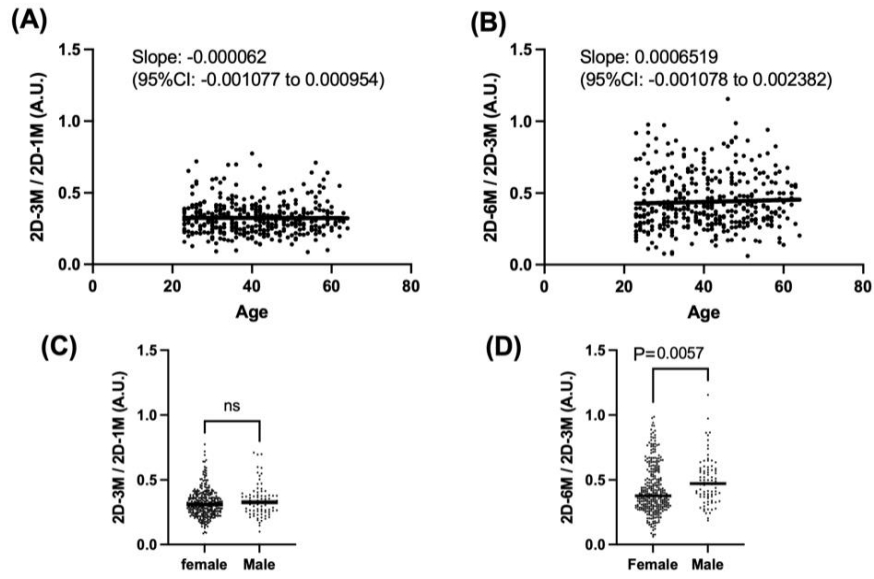

**Figure S3.** Longitudinal kinetics of Anti-SARS-CoV-2 RBD IgG antibodies after second dose of BNT162b2 vaccine by age and sex. (A, B) Linear regression analysis on the effect of age on the attenuation of anti-SARS-CoV-2 RBD IgG titers (A.U.) between 2D-1M and 2D-3M (A) and between 2D-3M and 2D-6M (B). The 2D-3M to 2D-1M and 2D-6M to 2D-3M antibody titers in each individual are indicated, respectively. (n=383) (C, D) Effect of gender difference in the attenuation of anti-SARS-CoV-2 RBD IgG titers (A.U.) between 2D-1M and 2D-3M (C) and between 2D-1M and 2D-6M (D). The 2D-3M to 2D-1M and 2D-6M to 2D-3M antibody titers in each individual are indicated, respectively. (n= 383) 95%CI: 95% confidence interval. ns: not significant.

A)

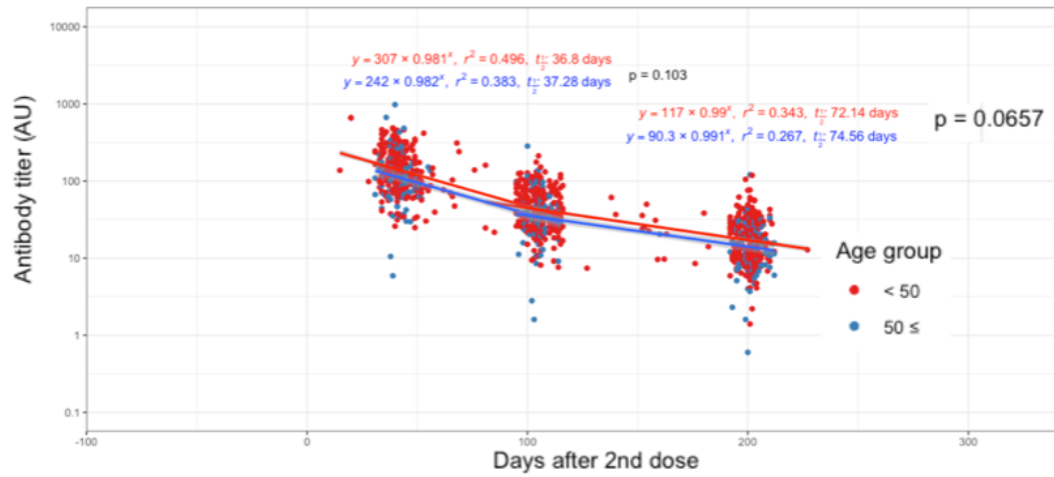

B)

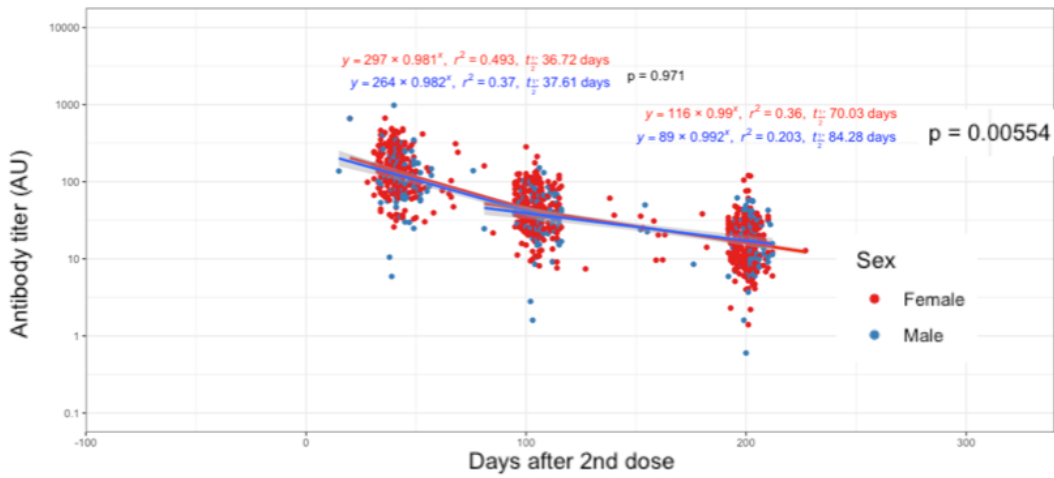

**Figure S4.** Longitudinal kinetics of Anti-SARS-CoV-2 RBD IgG antibodies after the two doses of BNT162b2 vaccine. Linear regression analysis of total of 1252 samples of post-vaccination from 431 subjects grouped by age (A: less than 50 or more than 50) and sex (B).
